# Supplementary material
Source: PubMed Central journal article supplement (PMC6143166)
Supplement: NIHMS79346-supplement-Supplementary_Tables_1-8.pdf [file NIHMS79346-supplement-Supplementary_Tables_1-8.pdf]

**Supplemental Table 1 General characteristics of the meta-analyses of prospective observational studies in breast cancer.** Evidence class was decided on the basis of the following criteria: Convincing evidence (class I) required >1,000 cases, highly significant summary associations ( $P < 10^{-6}$  by random effects), a 95% prediction interval not including the null, no evidence of small-study effects, no evidence of excess significance bias, and not large heterogeneity ( $I^2 < 50\%$ ). Highly suggestive evidence (class II) required >1,000 cases, highly significant summary associations ( $P < 10^{-6}$  by random effects), and the largest study to have a 95% CI that excluded 1. Suggestive evidence (class III) required only >1,000 cases and  $P < 0.001$  by random effects. All other risk factors with nominally significant summary associations ( $P < 0.05$ ) were coined as having weak evidence (class IV). Nonsignificant associations (NS) were those with  $P > 0.05$ .

(RR: relative risk, OR: odds ratio, HR: hazard ratios, CI: confidence interval, SRRE: summary relative risk estimates, NA: not applicable).

| Risk factor                                   | Reference         | Population                                              | Outcome                                            | Unit of comparison                            | Participants | Events                  | No. of studies   | Type of metric | Meta-analysis model | RR (95% CI)                                    | P value                                 | Prediction interval | $I^2$ (%)       | Evidence class                 |
|-----------------------------------------------|-------------------|---------------------------------------------------------|----------------------------------------------------|-----------------------------------------------|--------------|-------------------------|------------------|----------------|---------------------|------------------------------------------------|-----------------------------------------|---------------------|-----------------|--------------------------------|
| <b>Nutrient/dietary factor</b>                |                   |                                                         |                                                    |                                               |              |                         |                  |                |                     |                                                |                                         |                     |                 |                                |
| <b>Alcoholic drinks<sup>1</sup></b>           | Jung S, 2015      | Female from North America, Japan, Europe, and Australia | Incidence of ER+ and ER- breast cancers            | ≥30 g/d of alcohol consumption vs nondrinkers | 1,089,273    | ER+: 21,232; ER-: 4,343 | ER+: 20; ER-: 17 | RR             | Random              | ER+: 1.35 (1.23--1.48); ER-: 1.28 (1.10--1.49) | ER+: $5.2 \times 10^{-10}$ ; ER-: 0.001 | ER+: 1.07, 1.70     | ER+: 26; ER-: 0 | ER+: II <sup>2</sup> ; ER-: IV |
| <b>Marine n-3 polyunsaturated fatty acids</b> | Zheng J-S, 2013   | Female                                                  | Incidence                                          | Highest vs lowest category                    | 687,770      | 13,323                  | 17               | RR             | Random              | 0.86 (0.78--0.94)                              | 0.002                                   | NA                  | 54              | IV                             |
| <b>Egg</b>                                    | Si R, 2014        | Female                                                  | Incidence of pre- and postmenopausal breast cancer | >1/week (>7 g/day) vs <1/week (<7 g/day)      | 722,908      | 15,173                  | 11               | RR             | Random              | 1.04 (1.00--1.08)                              | 0.05                                    | NA                  | 0               | IV                             |
| <b>Dairy</b>                                  | Dong J-Y, 2011    | Female                                                  | Incidence                                          | Highest vs lowest category                    | 542,401      | 15,053                  | 10               | RR             | Random              | 0.85 (0.76--0.95)                              | 0.004                                   | NA                  | 54.5            | IV                             |
| <b>Polyunsaturated fat</b>                    | Turner LB, 2011   | Females                                                 | Incidence                                          | Highest vs lowest quartile of dietary intake  | 1,051,623    | 20,405                  | 13               | RR             | Random              | 1.09 (1.00--1.18)                              | 0.04                                    | NA                  | >50             | IV                             |
| <b>Processed meat</b>                         | Alexander D, 2011 | Females                                                 | Incidence                                          | High vs low intake                            | NA           | NA                      | 18               | SRRE           | Random              | 1.08 (1.01--1.16)                              | 0.03                                    | NA                  | >50             | IV                             |

|                                       |                |                                               |                                |                                                             |         |        |    |    |        |                   |                      |    |      |     |
|---------------------------------------|----------------|-----------------------------------------------|--------------------------------|-------------------------------------------------------------|---------|--------|----|----|--------|-------------------|----------------------|----|------|-----|
| <b>Soy</b>                            | Dong J-Y, 2011 | Female                                        | Incidence                      | Highest vs lowest category                                  | NA      | 5,587  | 14 | RR | Random | 0.89 (0.79--0.99) | 0.04                 | NA | 62.4 | IV  |
| <b>Isoflavone</b>                     | Xie Q, 2013    | Females in Asian countries                    | Incidence                      | Highest vs lowest categories of isoflavone intake           | 129,103 | NA     | 7  | RR | NA     | 0.78 (0.65--0.95) | 0.01                 | NA | NA   | IV  |
| <b>Cruciferous vegetables</b>         | Liu X, 2013    | USA females                                   | Incidence                      | Highest vs lowest consumptions level                        | 135,162 | 3,947  | 2  | RR | Fixed  | 0.86 (0.72--0.99) | 0.05                 | NA | 3    | IV  |
| <b>Vegetables</b>                     | Jung S, 2012   | Females                                       | Incidence of ER- breast cancer | Highest vs lowest quintiles of total vegetables consumption | 993,466 | 4,821  | 20 | RR | Random | 0.82 (0.74--0.90) | $8.1 \times 10^{-5}$ | NA | <50  | III |
| <b>Vegetables and fruits combined</b> | Aune D, 2012   | Females                                       | Incidence                      | Highest vs lowest intake                                    | 233,036 | 6,273  | 6  | RR | Random | 0.89 (0.80--0.99) | 0.03                 | NA | 0    | IV  |
| <b>Fruits</b>                         | Aune D, 2012   | Females                                       | Incidence                      | Highest vs lowest intake                                    | 785,668 | 16,763 | 10 | RR | Random | 0.92 (0.86--0.98) | 0.01                 | NA | 9    | IV  |
| <b>Retinol</b>                        | Fulan H, 2011  | Females                                       | Incidence                      | Highest vs lowest intake of total retinol                   | NA      | NA     | 8  | RR | Fixed  | 0.91 (0.84--0.98) | 0.02                 | NA | 27   | IV  |
| <b>Vitamin A</b>                      | Fulan H, 2011  | Females                                       | Incidence                      | Highest vs lowest total intake                              | NA      | NA     | 5  | RR | Fixed  | 0.89 (0.81--0.99) | 0.02                 | NA | 0    | IV  |
| <b>Glycemic index</b>                 | Choi Y, 2012   | Females from North America, Europe, and China | Incidence                      | Highest vs lowest category                                  | NA      | NA     | 11 | RR | Random | 1.06 (1.02--1.11) | 0.007                | NA | 0    | IV  |

|                                              |                   |                                              |                                                    |                                                                           |                  |        |    |       |        |                   |        |    |     |     |
|----------------------------------------------|-------------------|----------------------------------------------|----------------------------------------------------|---------------------------------------------------------------------------|------------------|--------|----|-------|--------|-------------------|--------|----|-----|-----|
| <b>α-carotene</b>                            | Hu F, 2012        | Females                                      | Incidence                                          | Per 1,500 lg/day of dietary intake                                        | 262,358          | 7,298  | 4  | OR/RR | Random | 0.91 (0.87--0.96) | 0.0002 | NA | 1   | III |
| <b>β-carotene</b>                            | Hu F, 2012        | Females                                      | Incidence                                          | Highest vs lowest level of dietary intake                                 | NA               | NA     | 5  | OR/RR | Random | 0.94 (0.89--0.97) | 0.005  | NA | 0   | IV  |
| <b>Dietary fiber</b>                         | Aune D, 2012      | Females from Europe, North America, and Asia | Incidence                                          | Highest vs lowest level of fiber intake                                   | 999,271          | 26,523 | 16 | RR    | Random | 0.93 (0.89--0.98) | 0.003  | NA | 0   | IV  |
| <b>Biomarker</b>                             |                   |                                              |                                                    |                                                                           |                  |        |    |       |        |                   |        |    |     |     |
| <b>n-3/n-6 PUFAs ratio in serum (plasma)</b> | Yang B, 2014      | Female, Europe, USA, Asia                    | Incidence of pre- and postmenopausal breast cancer | Highest category (tertile, quartile, and quintile) vs lowest or reference | 274,135          | 8,331  | 11 | RR    | Random | 0.90 (0.82--0.99) | 0.03   | NA | 11  | IV  |
| <b>Total carotenoids</b>                     | Eliassen AH, 2012 | Females                                      | Incidence                                          | Highest quintile to lowest quintile of blood level                        | 3,941 (controls) | 3,041  | -- | RR    | Random | 0.81 (0.68--0.96) | 0.02   | NA | <50 | IV  |
| <b>β-carotene</b>                            | Eliassen AH, 2012 | Females                                      | Incidence                                          | Top vs bottom quintile of blood levels                                    | 3,953            | 3,053  | 8  | RR    | Random | 0.83 (0.70--0.98) | 0.03   | NA | <50 | IV  |
| <b>Lycopene</b>                              | Eliassen AH, 2012 | Females                                      | Incidence                                          | Top vs bottom quintile of blood levels                                    | 3,941            | 3,041  | 8  | RR    | Random | 0.81 (0.68--0.96) | 0.02   | NA | <50 | IV  |

<sup>1</sup> Current study was used instead of the bigger meta-analysis of 7 cohort studies on alcohol consumption and breast cancer risk by Bagnardi et al. 2015 (RR for heavy drinkers vs nondrinkers: 1.50; 95% CI: 1.19--1.89) due to the limited information on summary statistics and included studies in Bagnardi et al. 2015

<sup>2</sup> Evidence was classified as highly suggestive (class II) due to the presence of excess significance bias ( $P_{\text{excess significance bias}} = 4 \times 10^{-8}$ ,  $P_{\text{small effect bias}} = 0.184$ )

**Supplemental Table 2 General characteristics of the meta-analyses of prospective observational studies in lung cancer.** Evidence class was decided on the basis of the following criteria: Convincing evidence (class I) required >1,000 cases, highly significant summary associations ( $P < 10^{-6}$  by random effects), a 95% prediction interval not including 1, and not large heterogeneity ( $I^2 < 50\%$ ). Highly suggestive evidence (class II) required >1,000 cases, highly significant summary associations ( $P < 10^{-6}$  by random effects), and the largest study to have a 95% CI that excluded 1. Suggestive evidence (class III) required only >1,000 cases and  $P < 0.001$  by random effects. All other risk factors with nominally significant summary associations ( $P < 0.05$ ) were coined as having weak evidence (class IV). Nonsignificant associations (NS) were those with  $P > 0.05$ . (RR: relative risk, OR: odds ratio, HR: hazard ratios, CI: confidence interval, SRRE: summary relative risk estimates, NA: not applicable).

| Nutrient/Diet                           | Reference          | Population                                        | Outcome   | Unit of comparison                   | Participants | Events | No. of studies | Type of metric | Meta-analysis model | RR (95% CI)       | P value              | Prediction interval | $I^2$ (%) | Evidence class |
|-----------------------------------------|--------------------|---------------------------------------------------|-----------|--------------------------------------|--------------|--------|----------------|----------------|---------------------|-------------------|----------------------|---------------------|-----------|----------------|
| <b><math>\alpha</math>-carotene</b>     | Gallicchio L, 2008 | Western populations, Singapore                    | Incidence | Highest vs lowest category of intake | 299,057      | 4,894  | 8              | RR             | Random              | 0.89 (0.79--1.00) | 0.05                 | NA                  | 15        | IV             |
| <b><math>\beta</math>-carotene</b>      | Yu N, 2015         | Populations from North America, Europe, and China | Incidence | Highest vs lowest category           | NA           | 5,395  | 10             | RR             | Random              | 0.87 (0.78--0.96) | 0.009                | NA                  | 7         | IV             |
| <b><math>\beta</math>-cryptoxanthin</b> | Gallicchio L, 2008 | Western populations, Singapore                    | Incidence | Highest vs lowest category of intake | 299,057      | 4,894  | 8              | RR             | Random              | 0.80 (0.72--0.89) | $4.4 \times 10^{-5}$ | NA                  | 0         | III            |
| <b>Lycopene</b>                         | Gallicchio L, 2008 | Western populations, Singapore                    | Incidence | Highest vs lowest category of intake | 340,894      | 5,032  | 9              | RR             | Random              | 0.86 (0.77--0.97) | 0.01                 | NA                  | 20        | IV             |
| <b>Lutein-zeaxanthin</b>                | Gallicchio L, 2008 | Western populations, Singapore                    | Incidence | Highest vs lowest category of intake | 169,334      | 3,945  | 5              | RR             | Random              | 0.89 (0.79--1.00) | 0.05                 | NA                  | 0         | IV             |
| <b>Carotenoids</b>                      | Gallicchio L, 2008 | Western populations, Singapore                    | Incidence | Highest vs lowest category of intake | 247,706      | 4,310  | 8              | RR             | Random              | 0.79 (0.71--0.87) | $7.1 \times 10^{-6}$ | NA                  | 0         | III            |

|                                    |                 |                                                                            |           |                            |         |        |    |    |        |                   |                    |            |    |    |
|------------------------------------|-----------------|----------------------------------------------------------------------------|-----------|----------------------------|---------|--------|----|----|--------|-------------------|--------------------|------------|----|----|
| <b>Vitamin A</b>                   | Yu N, 2015      | Populations from North America, Europe, and China                          | Incidence | Highest vs lowest category | NA      | 3,258  | 6  | RR | Random | 0.87 (0.76--0.98) | 0.03               | NA         | 53 | IV |
| <b>Soy food</b>                    | Wu SH, 2013     | --                                                                         | Incidence | Highest vs lowest intake   | NA      | NA     | 4  | RR | Fixed  | 0.85 (0.74--0.97) | 0.02               | NA         | 8  | IV |
| <b>Vegetables</b>                  | Vieira AR, 2016 | Populations from Asia, Europe, and North America                           | Incidence | Highest vs lowest intake   | NA      | 19,095 | 25 | RR | Random | 0.92 (0.87--0.97) | 0.002              | NA         | 0  | IV |
| <b>Soy/soy isoflavones</b>         | Yang W-S, 2011  | Females from Singapore and United States, and males and females from Japan | Incidence | Highest vs lowest intake   | 146,667 | 1,806  | 3  | RR | Fixed  | 0.92 (0.85--0.98) | 0.02               | NA         | 0  | IV |
| <b>Cruciferous vegetables</b>      | Vieira AR, 2016 | Populations from Asia, Europe, and North America                           | Incidence | Dose response per 50 g/day | NA      | 5,783  | 9  | RR | Random | 0.89 (0.79--1.00) | 0.05               | NA         | 50 | IV |
| <b>Total fruits and vegetables</b> | Vieira AR, 2016 | Populations from Asia, Europe, and North America                           | Incidence | Highest vs lowest intake   | NA      | 11,941 | 18 | RR | Random | 0.86 (0.78--0.94) | 0.002              | NA         | 37 | IV |
| <b>Fruits</b>                      | Vieira AR, 2016 | Populations from Asia, Europe, and North America                           | Incidence | Highest vs lowest intake   | NA      | 15,599 | 29 | RR | Random | 0.82 (0.76--0.89) | $1 \times 10^{-6}$ | 0.62, 1.07 | 32 | II |

|                      |                 |                                                  |           |                              |         |        |    |    |        |                   |        |    |    |     |
|----------------------|-----------------|--------------------------------------------------|-----------|------------------------------|---------|--------|----|----|--------|-------------------|--------|----|----|-----|
| <b>Citrus fruits</b> | Vieira AR, 2016 | Populations from Asia, Europe, and North America | Incidence | Highest vs lowest intake     | NA      | 12,021 | 15 | RR | Random | 0.85 (0.78--0.93) | 0.0003 | NA | 30 | III |
| <b>Flavonoids</b>    | Tang N-P, 2009  | Western populations                              | Incidence | Highest vs non/lowest intake | 235,816 | 3,247  | 8  | RR | Random | 0.73 (0.57--0.93) | 0.01   | NA | 69 | IV  |

**Supplemental Table 3 General characteristics of the meta-analyses of prospective observational studies in prostate cancer.** Evidence class was decided on the basis of the following criteria: Convincing evidence (class I) required >1,000 cases, highly significant summary associations ( $P < 10^{-6}$  by random effects), a 95% prediction interval not including the null, and not large heterogeneity ( $I^2 < 50\%$ ). Highly suggestive evidence (class II) required >1,000 cases, highly significant summary associations ( $P < 10^{-6}$  by random effects), and the largest study to have a 95% CI that excluded 1. Suggestive evidence (class III) required only >1,000 cases and  $P < 0.001$  by random effects. All other risk factors with nominally significant summary associations ( $P < 0.05$ ) were coined as having weak evidence (class IV). Nonsignificant associations (NS) were those with  $P > 0.05$ . (RR: relative risk, OR: odds ratio, HR: hazard ratios, CI: confidence interval, SRRE: summary relative risk estimates, NA: not applicable).

| Risk factor                              | Reference       | Population                                | Outcome                            | Unit of comparison                                                  | Participants | Events | No. of studies | Type of metric | Meta-analysis model | RR (95% CI)       | P value | Prediction interval | $I^2$ (%) | Evidence class |
|------------------------------------------|-----------------|-------------------------------------------|------------------------------------|---------------------------------------------------------------------|--------------|--------|----------------|----------------|---------------------|-------------------|---------|---------------------|-----------|----------------|
| <b>Nutrient/dietary factor</b>           |                 |                                           |                                    |                                                                     |              |        |                |                |                     |                   |         |                     |           |                |
| <b>Alpha - linolenic acid (n-3 PUFA)</b> | Fu Y-Q, 2014    | Men from Western countries                | Incidence                          | Per 0.5 g/day                                                       | NA           | NA     | 5              | RR             | Random              | 0.99 (0.98--1.00) | 0.05    | NA                  | 0         | IV             |
| <b>Total dairy</b>                       | Aune D, 2015    | Men                                       | Incidence                          | Highest vs lowest intake                                            | 848,395      | 38,107 | 15             | RR             | Random              | 1.09 (1.02--1.17) | 0.01    | NA                  | 43        | IV             |
| <b>Milk</b>                              | Aune D, 2015    | Men                                       | Incidence                          | High vs low intake                                                  | 566,146      | 11,392 | 15             | RR             | Random              | 1.11 (1.03--1.21) | 0.01    | NA                  | 21        | IV             |
| <b>Whole milk</b>                        | Aune D, 2015    | Men                                       | Incidence                          | High vs low intake                                                  | 448,719      | 19,664 | 8              | RR             | Random              | 0.92 (0.85--0.99) | 0.03    | NA                  | 0         | IV             |
| <b>Low-fat milk</b>                      | Aune D, 2015    | Men                                       | Incidence                          | High vs low intake                                                  | 432,943      | 19,430 | 6              | RR             | Random              | 1.14 (1.05--1.25) | 0.003   | NA                  | 51        | IV             |
| <b>Cheese</b>                            | Aune D, 2015    | Men                                       | Incidence                          | High vs low intake                                                  | 887,759      | 22,950 | 11             | RR             | Random              | 1.07 (1.01--1.13) | 0.02    | NA                  | 0         | IV             |
| <b>Dietary Calcium</b>                   | Aune D, 2015    | Men                                       | Incidence                          | High vs low intake                                                  | 800,879      | 35,493 | 15             | RR             | Random              | 1.18 (1.08--1.30) | 0.0005  | NA                  | 53        | III            |
| <b>Eggs</b>                              | Keum N, 2015    | Men from Europe, North America, and Japan | Incidence of fatal prostate cancer | Per 5 eggs consumed/week                                            | 95,980       | 609    | 4              | RR             | Random              | 1.47 (1.01--2.14) | 0.04    | NA                  | 40        | IV             |
| <b>Selenium</b>                          | Vinceti M, 2014 | Men                                       | Incidence                          | Highest vs lowest category of intake and biochemical selenium level | >466,204     | 6,532  | 17             | OR/RR          | Random              | 0.79 (0.69--0.90) | 0.0005  | NA                  | 23        | III            |

| Biomarkers                                 |                |                            |           |                                                                                                                   |        |       |   |    |           |                   |      |    |    |    |
|--------------------------------------------|----------------|----------------------------|-----------|-------------------------------------------------------------------------------------------------------------------|--------|-------|---|----|-----------|-------------------|------|----|----|----|
| <b>Stearic acid (saturated fatty acid)</b> | Crowe FL, 2014 | Men from Western countries | Incidence | Fifth quantile vs first quantile of level in plasma or serum phospholipids, whole blood, or erythrocyte membranes | 11,747 | 5,098 | 7 | OR | NOT CLEAR | 0.88 (0.78--1.00) | 0.04 | NA | 10 | IV |
| <b>Eicosapentaenoic acid (n-3 PUFA)</b>    | Crowe FL, 2014 | Men from Western countries | Incidence | Fifth quantile vs first quantile of level in plasma or serum phospholipids, whole blood, or erythrocyte membranes | 11,745 | 5,098 | 7 | OR | NOT CLEAR | 1.14 (1.01--1.29) | 0.04 | NA | 59 | IV |
| <b>Docosapentaenoic acid (n-3 PUFA)</b>    | Crowe FL, 2014 | Men from Western countries | Incidence | Fifth quantile vs first quantile of level in plasma or serum phospholipids, whole blood, or erythrocyte membranes | 11,744 | 5,097 | 7 | OR | NOT CLEAR | 1.16 (1.02--1.33) | 0.03 | NA | 80 | IV |
| <b>Linoleic acid (n-6 PUFA)</b>            | Crowe FL, 2014 | Men from Western countries | Incidence | Fifth quantile vs first quantile of level in plasma or serum phospholipids, whole blood, or erythrocyte membranes | 11,747 | 5,098 | 7 | OR | NOT CLEAR | 0.87 (0.77--0.98) | 0.02 | NA | 0  | IV |
| <b>Folate</b>                              | Tio M, 2014    | Men                        | Incidence | High vs low blood concentration                                                                                   | 9,778  | 5,904 | 6 | OR | Random    | 1.14 (1.02--1.28) | 0.02 | NA | 0  | IV |



**Supplemental Table 4 General characteristics of the meta-analyses of prospective observational studies in colorectal cancer.** Evidence class was decided on the basis of the following criteria: Convincing evidence (class I) required >1,000 cases, highly significant summary associations ( $P < 10^{-6}$  by random effects), a 95% prediction interval not including 1, no evidence of small-study effects, no evidence of excess significance bias, and no large heterogeneity ( $I^2 < 50\%$ ). Highly suggestive evidence (class II) required >1,000 cases, highly significant summary associations ( $P < 10^{-6}$  by random effects), and the largest study to have a 95% CI that excluded 1. Suggestive evidence (class III) required only >1,000 cases and  $P < 0.001$  by random effects. All other risk factors with nominally significant summary associations ( $P < 0.05$ ) were coined as having weak evidence (class IV). Nonsignificant associations (NS) were those with  $P > 0.05$ .

(RR: relative risk, OR: odds ratio, HR: hazard ratios, CI: confidence interval, SRRE: summary relative risk estimates, NA: not applicable).

| Risk factor                    | Reference              | Population                       | Outcome                                   | Unit of comparison                               | Participants | Events | No. of studies | Type of metric | Meta-analysis model | RR (95% CI)       | P value              | Prediction interval | $I^2$ (%) | Evidence class |
|--------------------------------|------------------------|----------------------------------|-------------------------------------------|--------------------------------------------------|--------------|--------|----------------|----------------|---------------------|-------------------|----------------------|---------------------|-----------|----------------|
| <b>Nutrient/dietary factor</b> |                        |                                  |                                           |                                                  |              |        |                |                |                     |                   |                      |                     |           |                |
| Multivitamins supplements      | Heine-Bröring RC, 2015 | Western populations, USA, Europe | Incidence of CRC                          | Use vs no use                                    | 1,031,046    | 9,925  | 16             | RR             | Random              | 0.92 (0.86--0.98) | 0.01                 | NA                  | 0         | IV             |
| Vitamin A supplements          | Heine-Bröring RC, 2015 | Western populations, USA, Europe | Incidence of colon cancer                 | Use vs no use                                    | 46,796       | 443    | 2              | RR             | Random              | 0.77 (0.62--0.94) | 0.01                 | NA                  | 0         | IV             |
| Total vitamin C                | Park Y, 2010           | North America, Europe            | Incidence and mortality of colon cancer   | Highest vs lowest category (>600 vs <100 mg/day) | 556,510      | 4,495  | 10             | RR             | Random              | 0.86 (0.74--0.99) | 0.04                 | NA                  | <50       | IV             |
| Total vitamin E                | Park Y, 2010           | North America, Europe            | Incidence and mortality of colon cancer   | Highest vs lowest category (>200 vs ≤6 mg/day)   | 556,510      | 4,495  | 10             | RR             | Random              | 0.80 (0.65--0.97) | 0.05                 | NA                  | <50       | IV             |
| Calcium                        | Keum N, 2014           | USA, Europe, Asia                | Incidence of colorectal and colon cancers | 300 mg daily increment of calcium intake         | 1,415,597    | 12,305 | 15             | RR             | Random              | 0.92 (0.89--0.94) | $4.8 \times 10^{-9}$ | 0.85, 1.01          | 47        | II             |
| Calcium supplements            | Heine-Bröring RC, 2015 | Western populations, USA, Europe | Incidence of CRC                          | Use vs no use                                    | 1,185,310    | 10,188 | 8              | RR             | Random              | 0.86 (0.79--0.95) | 0.001                | NA                  | 64        | IV             |

|                        |                        |                                      |                                |                                                               |           |        |    |    |        |                   |                         |            |     |                |
|------------------------|------------------------|--------------------------------------|--------------------------------|---------------------------------------------------------------|-----------|--------|----|----|--------|-------------------|-------------------------|------------|-----|----------------|
| Folic acid supplements | Heine-Bröring RC, 2015 | Western populations, USA, Europe     | Incidence of CRC               | Highest vs lowest dietary supplementation dose                | 291,006   | 4,057  | 3  | RR | Random | 0.88 (0.78--0.98) | 0.03                    | --         | 6   | IV             |
| Total folate           | Kim D-H, 2010          | North America, Europe                | Incidence and mortality of CRC | Highest vs lowest quantile                                    | 725,134   | 5,720  | 13 | RR | Random | 0.85 (0.77--0.95) | 0.002                   | NA         | <50 | IV             |
| Heme iron              | Qiao L, 2013           | North America, Europe, Japan         | Incidence of CRC               | Highest vs lowest category of intake                          | 651,272   | 8,269  | 8  | RR | Random | 1.14 (1.04--1.25) | 0.005                   | NA         | 12  | IV             |
| Zink                   | Qiao L, 2013           | North America, Europe, Japan         | Incidence of CRC               | Highest vs lowest category of intake                          | 350,507   | 5,676  | 6  | RR | Random | 0.83 (0.72--0.94) | 0.006                   | NA         | 35  | IV             |
| Magnesium              | Ko HJ, 2014            | Europe, Japan, USA                   | Incidence of CRC               | Highest vs lowest category of dietary intake                  | 222,091   | 3,305  | 4  | RR | Fixed  | 0.78 (0.66--0.92) | 0.003                   | NA         | 17  | IV             |
| Total fiber            | Aune D, 2011           | Europe, China, Japan, Singapore, USA | Incidence of CRC               | High vs low intake                                            | 1,995,293 | 14,794 | 19 | RR | Random | 0.88 (0.82--0.94) | 0.0003                  | NA         | 0   | III            |
| Glycemic index (GI)    | Choi Y, 2012           | North America, Europe, China         | Incidence of CRC               | Highest vs lowest category                                    | 1,110,891 | 12,573 | 9  | RR | Random | 1.08 (1.00--1.17) | 0.05                    | NA         | 29  | IV             |
| Alcohol <sup>1</sup>   | Fedirko V, 2011        | North America, Europe, Asia          | Incidence of CRC               | Heavy drinkers (≥50 g/day) vs nondrinkers/occasional drinkers | 988,878   | 1,208  | 7  | RR | Random | 1.57 (1.38--1.80) | 4.2 × 10 <sup>-11</sup> | 1.32, 1.87 | 0   | I <sup>2</sup> |

|                               |                    |                                      |                                                  |                                  |           |        |    |    |        |                   |                      |            |     |                |
|-------------------------------|--------------------|--------------------------------------|--------------------------------------------------|----------------------------------|-----------|--------|----|----|--------|-------------------|----------------------|------------|-----|----------------|
| Tea                           | Zhang X, 2010      | North America, Europe                | Incidence of colon cancer                        | Highest intake vs nonconsumers   | 604,710   | 4,394  | 11 | RR | Random | 1.28 (1.02--1.61) | 0.03                 | NA         | NA  | IV             |
| Fruit and vegetables combined | Aune D, 2011       | Japan, Europe, USA, Singapore        | Incidence of CRC                                 | Highest vs lowest intake         | 1,523,860 | 11,853 | 10 | RR | Random | 0.92 (0.86--0.99) | 0.02                 | 0.85, 0.99 | 22  | IV             |
| Fruits                        | Aune D, 2011       | Japan, Europe, USA                   | Incidence of CRC                                 | Highest vs lowest intake         | 1,558,147 | 14,876 | 14 | RR | Random | 0.90 (0.83--0.98) | 0.01                 | 0.85, 0.96 | 42  | IV             |
| Vegetables                    | Aune D, 2011       | Japan, Europe, USA, Singapore        | Incidence of CRC                                 | Highest vs lowest intake         | 1,694,236 | 16,057 | 15 | RR | Random | 0.91 (0.86--0.96) | 0.0008               | 0.86, 0.96 | 0   | III            |
| Whole grains                  | Aune D, 2011       | Europe, USA                          | Incidence of CRC                                 | High vs low intake               | 642,060   | 5,477  | 4  | RR | Random | 0.79 (0.72--0.86) | $3.1 \times 10^{-7}$ | 0.65, 0.96 | 0   | I <sup>3</sup> |
| Fish                          | Yu XF, 2014        | Europe, USA, Asia, Australia         | Incidence of CRC                                 | Yes vs no intake                 | 1,633,066 | 14,097 | 20 | RR | Random | 0.93 (0.87--0.99) | 0.03                 | NA         | 65  | IV             |
| Dairy products                | Aune D, 2012       | Europe, USA, Asia                    | Incidence of CRC                                 | Highest vs lowest dietary intake | 1,170,942 | 11,579 | 12 | RR | Random | 0.81 (0.74--0.90) | $2.9 \times 10^{-5}$ | NA         | 42  | III            |
| Nonfermented milk             | Ralston RA, 2014   | Europe, USA, China                   | Incidence of CRC and of colon and rectal cancers | Highest vs lowest category       | 892,569   | 7,735  | 14 | RR | Random | 0.85 (0.77--0.93) | 0.0008               | NA         | 0   | III            |
| Milk                          | Aune D, 2012       | Europe, USA, China                   | Incidence and mortality of CRC                   | Per 200 g/day intake             | 566,035   | 4,510  | 9  | RR | Random | 0.91 (0.85--0.94) | 0.0003               | NA         | 0   | III            |
| Red meat                      | Alexander DD, 2011 | Europe, USA, Canada, Australia, Asia | Incidence and mortality of CRC                   | Highest vs lowest intake         | 1,892,868 | 16,560 | 25 | RR | Random | 1.12 (1.04--1.21) | 0.003                | NA         | >50 | IV             |

|                                                                                                                            |                |                             |                                                  |                                                                                      |                                |                                                |                     |    |        |                                                           |                           |    |                     |     |
|----------------------------------------------------------------------------------------------------------------------------|----------------|-----------------------------|--------------------------------------------------|--------------------------------------------------------------------------------------|--------------------------------|------------------------------------------------|---------------------|----|--------|-----------------------------------------------------------|---------------------------|----|---------------------|-----|
| Processed meat                                                                                                             | Chan DSM, 2011 | Europe, USA, Australia      | Incidence and mortality of CRC                   | Per 50 g/day                                                                         | 1,303,149                      | 10,863                                         | 9                   | -- | --     | 1.18 (1.10--1.28)                                         | $2.3 \times 10^{-5}$      | NA | 12                  | III |
| Beef                                                                                                                       | Carr P, 2015   | Europe, Japan               | Incidence of CRC and of colon and rectal cancers | Highest versus lowest level of intake                                                | CRC: 657,469<br>Colon: 179,429 | CRC: 4,545<br>Colon: 2,160                     | CRC: 5;<br>Colon: 3 | RR | Random | Colorectal: 1.11 (1.01--1.22)<br>Colon: 1.24 (1.07--1.44) | CRC: 0.03<br>Colon: 0.005 | NA | CRC: 0<br>Colon: 11 | IV  |
| Lamb                                                                                                                       | Carr P, 2015   | Europe                      | Incidence of CRC and of colon and rectal cancers | Highest versus lowest level of intake                                                | 532,028                        | CRC: 1,329<br>Colon: 644<br>Rectal: 345        | CRC: 2              | RR | Random | CRC: 1.24 (1.08--1.44)                                    | 0.003                     | NA | CRC: 0              | IV  |
| Poultry                                                                                                                    | Carr P, 2015   | Europe, Asia, North America | Incidence of CRC and of colon and rectal cancers | Highest versus lowest level of intake                                                | 1,422,299                      | 81,211                                         | Rectal: 11          | RR | Random | Rectal: 0.89 (0.80--0.98)                                 | Rectal: 0.02              | NA | Rectal: 0           | IV  |
| <b>Biomarkers</b>                                                                                                          |                |                             |                                                  |                                                                                      |                                |                                                |                     |    |        |                                                           |                           |    |                     |     |
| Circulating Vitamin D (25(OH)D)                                                                                            | Lee JE, 2011   | USA, Japan, Europe          | Incidence of colon cancer and rectal cancer      | Top versus bottom quantiles of circulating 25(OH)D levels                            | NA                             | 1,822 colon cancer and 868 rectal cancer cases | 8                   | OR | Random | 0.66 (0.54--0.81)                                         | $6.8 \times 10^{-5}$      | NA | NA                  | III |
| Total <i>n</i> -3 PUFA - sum of C22:6 <i>n</i> -3, C22:5 <i>n</i> -3, C20:5 <i>n</i> -3 compositions in human biospecimens | Yang B, 2014   | Europe, USA, Japan          | Incidence of colorectal cancer                   | Highest vs lowest levels in serum, plasma, whole blood, erythrocytes, adipose tissue | 58,713                         | 675                                            | 3                   | RR | Random | 0.76 (0.59--0.97)                                         | 0.03                      | NA | 10                  | IV  |

<sup>1</sup>Current study was used instead of the bigger meta-analysis of 14 cohort studies on alcohol consumption and colorectal cancer risk by Bagnardi et al. 2015 (RR for heavy drinkers vs non-drinkers: 1.41; 95% CI, 1.23--1.63) due to the limited information on summary statistics and included studies in Bagnardi et al. 2015

<sup>2</sup>No evidence of small effect ( $P_{\text{small effect bias}} = 0.802$ ) or excess significance bias ( $P_{\text{excess significance bias}} = 0.254$ )

<sup>3</sup>No evidence of small effect ( $P_{\text{small effect bias}} = 0.947$ ) or excess significance bias ( $P_{\text{excess significance bias}} = 0.11$ )

**Supplemental Table 5 General characteristics of the meta-analyses of prospective observational studies in stomach cancer.** Evidence class was decided on the basis of the following criteria: Convincing evidence (class I) required >1,000 cases, highly significant summary associations ( $P < 10^{-6}$  by random effects), a 95% prediction interval not including the null, and not large heterogeneity ( $I^2 < 50\%$ ). Highly suggestive evidence (class II) required >1,000 cases, highly significant summary associations ( $P < 10^{-6}$  by random-effects), and the largest study to have a 95% CI excluding the null value. Suggestive evidence (class III) required only >1,000 cases and  $P < 0.001$  by random effects. All other risk factors with nominally significant summary associations ( $P < 0.05$ ) were coined as having weak evidence (class IV). Nonsignificant associations (NS) were those with  $P > 0.05$ . (RR: relative risk, OR: odds ratio, HR: hazard ratios, CI: confidence interval, SRRE: summary relative risk estimates, NA: not applicable).

| Nutrient/dietary intake | Reference    | Population        | Outcome             | Unit of comparison       | Participants | Events | No. of studies | Type of metric | Meta-analysis model | RR (95% CI)       | P value              | Prediction interval | $I^2$ (%) | Evidence class |
|-------------------------|--------------|-------------------|---------------------|--------------------------|--------------|--------|----------------|----------------|---------------------|-------------------|----------------------|---------------------|-----------|----------------|
| Vitamin E               | Li P, 2014   | USA, Europe       | Incidence           | Highest vs lowest intake | 557,765      | 1,198  | 4              | RR             | Fixed               | 0.81 (0.66--0.98) | 0.04                 | NA                  | 0         | IV             |
| Vitamin C               | Li P, 2014   | Europe, USA       | Incidence           | Highest vs lowest intake | 66,095       | 795    | 4              | HR/RR          | Fixed               | 0.77 (0.61--0.97) | 0.03                 | NA                  | 0         | IV             |
| High-salt food          | Fang X, 2015 | Asia, Europe      | Incidence/mortality | Highest vs lowest intake | 274,250      | 2,271  | 12             | RR             | Random              | 1.55 (1.17--2.05) | 0.002                | NA                  | 53        | IV             |
| Salt                    | Fang X, 2015 | Asia, Europe      | Incidence/mortality | Highest vs lowest intake | 2,569,145    | 14,850 | 8              | RR             | Random              | 1.11 (1.05--1.16) | $4.7 \times 10^{-5}$ | NA                  | 26        | III            |
| Alcohol                 | Fang X, 2015 | Asia, Europe, USA | Incidence/mortality | Highest vs lowest intake | 2,511,522    | 9,469  | 24             | RR             | Random              | 1.15 (1.01--1.31) | 0.03                 | NA                  | 64        | IV             |
| Beer                    | Fang X, 2015 | Asia, Europe, USA | Incidence/mortality | Highest vs lowest intake | 1,197,197    | 2,482  | 13             | RR             | Random              | 1.21 (1.02--1.43) | 0.03                 | NA                  | 31        | IV             |
| Liquor                  | Fang X, 2015 | Asia, Europe, USA | Incidence/mortality | Highest vs lowest intake | 1,197,197    | 2,482  | 12             | RR             | Random              | 1.22 (1.05--1.43) | 0.01                 | NA                  | 6         | IV             |
| Total fruits            | Fang X, 2015 | Asia, Europe, USA | Incidence/mortality | Highest vs lowest intake | 2,811,612    | 7,632  | 30             | RR             | Random              | 0.93 (0.89--0.98) | 0.003                | NA                  | 2         | IV             |
| Fruits                  | Wang Q, 2014 | USA, Europe, Asia | Incidence/mortality | High vs low intake       | 1,517,969    | 5,318  | 22             | SRR            | Random              | 0.90 (0.83--0.98) | 0.01                 | NA                  | 1%        | IV             |
| Citrus fruit            | Fang X, 2015 | Asia, Europe, USA | Incidence/mortality | Highest vs lowest intake | 2,846,394    | 4,259  | 11             | RR             | Random              | 0.90 (0.82--1.00) | 0.04                 | NA                  | 41        | IV             |
| White vegetables        | Fang X, 2015 | Japan             | Incidence/mortality | Highest vs lowest intake | 51,186       | 531    | 6              | RR             | Random              | 0.67 (0.47--0.95) | 0.03                 | NA                  | 0         | IV             |
| Pickled vegetables      | Fang X, 2015 | Asia, Europe      | Incidence/mortality | Highest vs lowest intake | 540,913      | 6,840  | 20             | RR             | Random              | 1.18 (1.02--1.36) | 0.02                 | NA                  | 55        | IV             |
| Tomatoes                | Fang X, 2015 | Asia, Europe, USA | Incidence/mortality | Highest vs lowest intake | 722,446      | 1,869  | 5              | RR             | Random              | 1.11 (1.01--1.22) | 0.03                 | NA                  | 0         | IV             |

| Nutrient/dietary intake    | Reference     | Population        | Outcome             | Unit of comparison                                                   | Participants | Events | No. of studies | Type of metric | Meta-analysis model | RR (95% CI)       | P value | Prediction interval | I <sup>2</sup> (%) | Evidence class |
|----------------------------|---------------|-------------------|---------------------|----------------------------------------------------------------------|--------------|--------|----------------|----------------|---------------------|-------------------|---------|---------------------|--------------------|----------------|
| <b>Spinach</b>             | Fang X, 2015  | Asia, Europe, USA | Incidence/mortality | Highest vs lowest intake                                             | 722,446      | 1,869  | 5              | RR             | Random              | 1.21 (1.01--1.46) | 0.04    | NA                  | 0                  | IV             |
| <b>Pickled food</b>        | Ren J-S, 2012 | Asia, USA, Europe | Incidence/mortality | Pickled vegetables/food users vs non-users or lowest category of use | 224,879      | 3,692  | 10             | RR             | Random              | 1.32 (1.10--1.59) | 0.003   | NA                  | 70                 | IV             |
| <b>Salted fish</b>         | Fang X, 2015  | Asia, Europe, USA | Incidence/mortality | Highest vs lowest intake                                             | 291,071      | 2,811  | 11             | RR             | Random              | 1.25 (1.07--1.47) | 0.006   | NA                  | 0                  | IV             |
| <b>Processed meat</b>      | Fang X, 2015  | Asia, Europe, USA | Incidence/mortality | Highest vs lowest intake                                             | 2,002,100    | 3,243  | 13             | RR             | Random              | 1.15 (1.03--1.29) | 0.01    | NA                  | 8                  | IV             |
| <b>Ham, bacon, sausage</b> | Fang X, 2015  | Asia, Europe, USA | Incidence/mortality | Highest vs lowest intake                                             | 321,858      | 1,573  | 11             | RR             | Random              | 1.21 (1.01--1.46) | 0.04    | NA                  | 31                 | IV             |

**Supplemental Table 6 General characteristics of meta-analyses of RCTs.**<sup>a</sup> Evidence class was decided on the basis of the following criteria: Convincing evidence (class I) required >1,000 cases, highly significant summary associations ( $P < 10^{-6}$  by random effects), a 95% prediction interval not including the null, and not large heterogeneity ( $I^2 < 50\%$ ). Highly suggestive evidence (class II) required >1,000 cases, highly significant summary associations ( $P < 10^{-6}$  by random effects), and the largest study to have a 95% CI that excluded 1. Suggestive evidence (class III) required only >1,000 cases and  $P < 0.001$  by random effects. All other risk factors with nominally significant summary associations ( $P < 0.05$ ) were coined as having weak evidence (class IV). Nonsignificant associations (NS) were those with  $P > 0.05$ . (RR: relative risk, OR: odds ratio, HR: hazard ratios, CI: confidence interval, SRRE: summary relative risk estimates, NA: not applicable).

| Nutrients/food         | Author        | Date | Control population | Population                                                                                          | Participants total | Events total | Type of metric | Meta-analysis model | No. of studeis | Reported RR (95% CI) | Heterogeneity, $I^2(\%)$ , $P_{\text{heterogeneity}}$ | P value  | Class | Notes                                                                                                            |
|------------------------|---------------|------|--------------------|-----------------------------------------------------------------------------------------------------|--------------------|--------------|----------------|---------------------|----------------|----------------------|-------------------------------------------------------|----------|-------|------------------------------------------------------------------------------------------------------------------|
| <b>BREAST CANCER</b>   |               |      |                    |                                                                                                     |                    |              |                |                     |                |                      |                                                       |          |       |                                                                                                                  |
| <b>LUNG CANCER</b>     |               |      |                    |                                                                                                     |                    |              |                |                     |                |                      |                                                       |          |       |                                                                                                                  |
| <b>β-carotene</b>      | Tanvetyanon T | 2008 |                    | High-risk populations (smokers, exposed to asbestos)                                                | 109,394            | 1,484        | OR             | Random              | 4              | 1.21 (1.09--1.32)    | 32.5%, 0.22                                           | 0.000108 | III   | Effect stronger in current smokers (OR: 1.24, 95% CI: 1.10--1.39), no effect in former smokers and never smokers |
| <b>PROSTATE CANCER</b> |               |      |                    |                                                                                                     |                    |              |                |                     |                |                      |                                                       |          |       |                                                                                                                  |
| <b>Folic acid</b>      | Vollset S.E.  | 2013 | Placebo            | Patient with previous colorectal adenoma, people with or at high risk of the cardiovascular disease | 49,621             | 656          | RR             | Random              | 13             | 1.15 (0.94--1.41)    | NA                                                    |          | NS    |                                                                                                                  |



|                                 |                 |      |                                                         |                                                                         |       |    |    |        |   |                   |           |      |    |  |
|---------------------------------|-----------------|------|---------------------------------------------------------|-------------------------------------------------------------------------|-------|----|----|--------|---|-------------------|-----------|------|----|--|
| <b>Calcium supplementations</b> | Bristow S.M.    | 2013 | Placebo                                                 | General populations or patients with osteoporosis or colorectal adenoma | 7,221 | 24 | HR | Random | 4 | 0.54 (0.30--0.96) | 0%        | 0.04 | IV |  |
| <b>Soy/isoflavones</b>          | Diana van Die M | 2013 | Placebo or soy protein isolate with isoflavones removed | Males with clinically identified risk (negative prostate biopsy)        | 122   | 32 | RR | Fixed  | 2 | 0.49 (0.26--0.95) | 42%, 0.19 | 0.03 | IV |  |
| <b>BOWEL CANCER</b>             |                 |      |                                                         |                                                                         |       |    |    |        |   |                   |           |      |    |  |
| <b>STOMACH CANCER</b>           |                 |      |                                                         |                                                                         |       |    |    |        |   |                   |           |      |    |  |

<sup>a</sup>No meta-analyses on randomized clinical studies for corresponding cancer types were identified.

**Supplemental Table 7** General characteristics of meta-analyses for gene--environment interactions (RR: relative risk, OR: odds ratios, CI: confidence interval)<sup>a</sup>

| Nutrient /food       | Genetic variant | Gene (or near gene) | Author, date     | Participants | Events | Type of metric | Meta-analysis model                              | No. of studies | Reported RR (95% CI)                                                                                 | P for inter | Heterog, $P_h$                           | Prior score category (based on dietary factors and genetic variants evidence) | Venice Criteria for observed association | Combined score |
|----------------------|-----------------|---------------------|------------------|--------------|--------|----------------|--------------------------------------------------|----------------|------------------------------------------------------------------------------------------------------|-------------|------------------------------------------|-------------------------------------------------------------------------------|------------------------------------------|----------------|
| <b>BREAST CANCER</b> |                 |                     |                  |              |        |                |                                                  |                |                                                                                                      |             |                                          |                                                                               |                                          |                |
| Alcohol              | rs4880          | <i>MnSO D</i>       | Liu G, 2012      | 3,064        | 1,301  | OR             | Non drinkers<br>Fixed<br>Ever drinkers<br>Random | 14             | Val/Ala+Ala/ALA vs Val/Val<br><br>Nondrinkers: 0.97 (0.80--1.18)<br>Ever drinkers: 1.42 (0.89--2.26) | >0.05       | Nondrinkers: 0.31<br>Ever drinkers: 0.02 | Weak: 3                                                                       | CCC                                      | No evidence    |
|                      | rs17468277      | <i>CASP8</i>        | Nickels S, 2013  | 15,386       | 6,081  | OR             | Fixed                                            | 24             | <20 g/day alcohol: 0.91 (0.84--0.98)<br>≥20 g/day 1.45 (1.14--1.85)                                  | 0.0003      | 0.30                                     | Weak: 3                                                                       | CBC                                      | Weak evidence  |
|                      | rs1045485       | <i>CASP8</i>        | Barrdahl M, 2014 | 40,376       | 17,988 | OR             | Random                                           | 2 consortia    | 1.14 (0.98--1.31)                                                                                    | 0.08        | 0.006                                    | Weak: 3                                                                       | CCC                                      | No evidence    |

|                         |                        |       |                    |                     |       |    |       |                                                                                |                                                                                                                                                                                           |      |                                                                       |         |     |                                |
|-------------------------|------------------------|-------|--------------------|---------------------|-------|----|-------|--------------------------------------------------------------------------------|-------------------------------------------------------------------------------------------------------------------------------------------------------------------------------------------|------|-----------------------------------------------------------------------|---------|-----|--------------------------------|
|                         | rs2853826<br>(A10398G) | ND3   | Blein S,<br>2014   | 3,983<br>(controls) | 3306  | OR |       | Breast<br>and<br>Prostate<br>Cancer<br>Cohort<br>Consorti<br>um (9<br>cohorts) | Breast<br>cancer risk<br><br>G10398 –<br>Drinkers<br>vs. A10398<br>-<br>Nondrinke<br>rs<br>1.16 (0.99-<br>- 1.36)                                                                         | 0.98 |                                                                       | Weak: 3 | C-C | No<br>evidence                 |
|                         | rs698                  | ADH1C | Mao Q,<br>2015     | 3,434               | 1610  | OR |       | 3                                                                              | ADH1C <sup>1-1</sup><br>+ ADH1C <sup>1-2</sup> in<br>drinkers:<br>1.35 (1.03-<br>-1.76)<br>ADH1C <sup>1-1</sup><br>+ ADH1C <sup>1-2</sup> in<br>nondrinker<br>s: 1.16<br>(0.86--<br>1.57) | NR   | Drinkers<br><i>P</i> = 0.89<br><br>Nondrink<br>ers <i>P</i> =<br>0.53 | Weak: 3 | --C | Not<br>possible to<br>evaluate |
| <b>Caroten<br/>oids</b> | rs2333227<br>(G463A)   | MPO   | Pabalan N,<br>2012 | 4,915               | 2,192 | OR | Fixed | 2                                                                              | A vs G<br>For low<br>carotenoid<br>intake:<br>1.05 (0.92-<br>-1.20)<br>For high<br>carotenoid<br>intake:<br>0.86 (0.75-<br>-0.99)                                                         | 0.88 | 0.14                                                                  | Weak: 3 | BBC | No<br>evidence                 |
| <b>LUNG CANCER</b>      |                        |       |                    |                     |       |    |       |                                                                                |                                                                                                                                                                                           |      |                                                                       |         |     |                                |

| PROSTATE CANCER   |                         |        |                    |        |       |    |        |                    |                                                                                                                                                           |                                            |      |                 |     |                  |
|-------------------|-------------------------|--------|--------------------|--------|-------|----|--------|--------------------|-----------------------------------------------------------------------------------------------------------------------------------------------------------|--------------------------------------------|------|-----------------|-----|------------------|
| COLORECTAL CANCER |                         |        |                    |        |       |    |        |                    |                                                                                                                                                           |                                            |      |                 |     |                  |
| Alcohol           | rs1805087<br>(A2756G)   | MTR    | Ding W,<br>2013    | 3,934  | 1,398 | OR | Random | 4                  | Heavy alcohol<br>drinkers<br>(≥50 g<br>ethanol/d<br>on ≥5<br>day/week)<br>with the G<br>allele vs.<br>the wild<br>AA<br>genotype:<br>2.00 (1.28-<br>3.09) | 0.002                                      | 0.38 | Weak: 3         | -BB | Weak<br>evidence |
|                   | rs1042522<br>(Pro72Arg) | p53    | Liu Y, 2011        | 1,464  | 501   | OR |        | 2 Asian<br>studies | Alcohol<br>consumers<br>vs.<br>noncon-<br>sumers<br>Arg/Arg:<br>0.67 (0.41-<br>1.09)<br>Pro/Pro:<br>0.91 (0.52-<br>1.57)                                  | Arg/A<br>rg<br>0.11<br>Pro/P<br>ro<br>0.73 |      | Weak: 3         | --C | No<br>evidence   |
| Vegetables        | rs16892766              | 8q23.3 | Hutter<br>CM, 2012 | 16,739 | 7,016 | OR | Fixed  | 9 GWAS             | 1.88 (1.36-<br>2.59)                                                                                                                                      | 0.02                                       | 0.68 | Moderate<br>: 2 | CBB | Weak<br>Evidence |

|                               |              |                               |                     |        |       |    |       |         |                                                                      |         |      |         |     |                   |
|-------------------------------|--------------|-------------------------------|---------------------|--------|-------|----|-------|---------|----------------------------------------------------------------------|---------|------|---------|-----|-------------------|
| <b>Cruciferous vegetables</b> | Present/null | <i>GSTM1</i> and <i>GSTT1</i> | Tse G, 2014         | 11,144 | 3,556 | OR |       | 6       | Double null 0.86 (0.70--1.06)<br>Double non-null 1.11 (0.86--1.43)   | NS      | -    | Weak: 3 | -CB | No evidence       |
|                               | Present/null | <i>GSTM1</i>                  | Tse G, 2014         | 12,383 | 4,016 | OR |       | 8       | Single null: 1.05 (0.92--1.19)<br>Single non-null: 1.02 (0.92--1.13) | NS      | -    | Weak: 3 | -CB | No evidence       |
|                               | Present/null | <i>GSTT1</i>                  | Tse G, 2014         | 11,144 | 3,556 | OR |       | 6       | Single null: 0.78 (0.64--0.95)<br>Single non-null: 1.02 (0.90--1.13) | <0.05   | -    | Weak: 3 | -CB | Weak evidence     |
| <b>Processed meat</b>         | rs4143094    | 10p14                         | Figueiredo JC, 2014 | 18,404 | 9,287 | OR | Fixed | 10 GWAS | 1.17 (1.11--1.23)                                                    | 8.7E-09 | 0.78 | Weak: 3 | BBB | Moderate evidence |

<sup>a</sup>No meta-analyses on gene—diet interactions were identified for corresponding cancer types and foods and nutrients for which the evidence was classified as I, II, or III.

**Supplemental Table 8 Evaluation of genetic evidence for variants identified in gene-environment interaction literature search.** Evidence class was decided on the basis of the HuGENet Venice criteria (9, 10): Only genetic effects with  $P < 10^{-5}$  were considered for evaluation. On the basis of a combination of three criteria (amount of evidence, degree of replication, and protection from bias) (each of which can be scored A, B, or C), the epidemiological evidence for an effect of the genotype is classified as strong, moderate, or weak. For amount of evidence, a grade of A, B, or C was assigned when the sample size for the rarer genotype in the meta-analyses was greater than 1,000, 100--1,000, or less than 100, respectively. For replication consistency, we used  $I^2 < 25\%$  to assign grade A, 25--50% to assign grade B, and  $> 50\%$  or a  $P$  value for heterogeneity  $< 0.10$  to assign grade C. For protection from bias, a grade of A means that bias, if present, may change the magnitude but not the presence of an association; a grade of B means that there is no evidence of bias that would invalidate an association, but important information is missing; and a grade of C means that there is a strong possibility of bias that would render the finding of an association invalid.

| Traits        | Genetic variant               | Gene (or near gene) | Author, date  | Discovery sample size                                 | Replication on sample size/no. of studies in meta-analysis | Type of metric | EAF           | Reported RR (95% CI)                                                                                                                                                                                                  | $P$                                                                                                                                      | Heterog, $P_h$                                                                                                                               | Venice criteria | Evidence class |
|---------------|-------------------------------|---------------------|---------------|-------------------------------------------------------|------------------------------------------------------------|----------------|---------------|-----------------------------------------------------------------------------------------------------------------------------------------------------------------------------------------------------------------------|------------------------------------------------------------------------------------------------------------------------------------------|----------------------------------------------------------------------------------------------------------------------------------------------|-----------------|----------------|
| Breast cancer | rs4880, Val16Ala              | <i>mnSOD</i>        | Qiu L-X, 2010 | 26,022 cases and 32,426 controls                      | NA, meta-analysis of 32 studies                            | OR             | Not available | Val/Ala vs. Val/Val: OR = 1.022, 95% CI = 0.981–1.064; Ala/Ala vs. Val/Val: OR = 1.006, 95% CI = 0.934–1.083; dominant model: OR = 1.013, 95% CI = 0.962–1.066; and recessive model: OR = 0.985, 95% CI = 0.931–1.042 | Val/Ala vs. Val/Val: $P = 0.2976$ ; Ala/Ala vs. Val/Val: $P = 0.8833$ ; dominant model: $P = 0.6345$ ; and recessive model: $P = 0.6113$ | Val/Ala vs. Val/Val: $P_h = 0.103$ ; Ala/Ala vs. Val/Val: $P_h = 0.004$ ; dominant model: $P_h = 0.028$ ; and recessive model: $P_h = 0.023$ | -               | NS             |
|               | rs17468277/rs1045485 (D302H)* | <i>CASP8</i>        | Lin W-Y, 2015 | 46,450 cases and 42,600 controls of European ancestry | 10,052 cases and 12,575 controls of European ancestry      | OR             | 0.11          | 0.94 (0.875--1.01)                                                                                                                                                                                                    | 0.0947                                                                                                                                   | $I^2 = 79\%$ , $P_h = 0.0288$                                                                                                                | -               | NS             |

|                              |                                |                         |                    |                                                                                              |                     |    |                     |                                                                                                                  |                                                                                         |                                                                                                                                   |     |        |
|------------------------------|--------------------------------|-------------------------|--------------------|----------------------------------------------------------------------------------------------|---------------------|----|---------------------|------------------------------------------------------------------------------------------------------------------|-----------------------------------------------------------------------------------------|-----------------------------------------------------------------------------------------------------------------------------------|-----|--------|
|                              | rs28538<br>26<br>(A10398<br>G) | <i>ND3</i>              | Blein S,<br>2014   | 13,511<br>cases with<br>postmeno<br>pausal<br>breast<br>cancer<br>and<br>matched<br>controls | Meta, 5<br>studies  | OR | Not<br>provi<br>ded | Results not<br>provided                                                                                          | Results not<br>provided                                                                 | Results not<br>provided                                                                                                           | -   | NS     |
|                              | rs698                          | <i>ADH1C</i>            | Wang L,<br>2012    | 6,159<br>cases and<br>5,732<br>controls of<br>European<br>ancestry                           | Meta, 12<br>studies | OR | Not<br>provi<br>ded | 1.01 (0.97--1.06)                                                                                                | 0.67                                                                                    | $P_h = 0.574$                                                                                                                     | -   | NS     |
|                              | rs23332<br>27<br>(G463A)       | <i>MPO</i>              | Pabalan<br>N, 2012 | 2,975<br>cases and<br>3,427<br>controls                                                      | Meta, 3<br>studies  | OR | 0.20-<br>0.26       | Per allele effect:<br>premenopausal:<br>0.88 (0.72--<br>1.06);<br>postmenopausal<br>cancer: 1.01<br>(0.95--1.12) | Per allele<br>effect:<br>premenopa<br>usal: 0.19;<br>postmenop<br>ausal<br>cancer: 0.77 | Per allele effect:<br>premenopausal:<br>$I^2 = 5\%$ , $P_h =$<br>0.31;<br>postmenopausal<br>cancer: $I^2 = 0\%$ ,<br>$P_h = 0.54$ | -   | NS     |
| <b>Colorectal<br/>cancer</b> | rs18050<br>87<br>(A2756G<br>)  | <i>MTR</i>              | Zhao Y,<br>2013    | 13,465<br>patients<br>and<br>20,430<br>controls                                              | Meta, 26<br>studies | OR | 0.06-<br>0.25       | 1.03 (0.96--1.09)                                                                                                | 0.25                                                                                    | $P_h = 0.008$                                                                                                                     | -   | NS     |
|                              | rs10425<br>22<br>(A2756G<br>)  | <i>P53</i>              | Ma X,<br>2014      | 10,515<br>cases and<br>12,909<br>controls                                                    | Meta, 31<br>studies | OR | 0.312<br>8          | 1.00 (0.92--1.10)                                                                                                | 0.922                                                                                   | $I^2 = 72\%$ , $P_h <$<br>0.01                                                                                                    | -   | NS     |
|                              | rs16892<br>766                 | 8q23.3,<br><i>EIF3H</i> | Li M,<br>2015      | 41,728<br>cases and<br>44,393<br>controls                                                    | Meta, 11<br>studies | OR | 0.1                 | 1.22 (1.18--1.27)                                                                                                | $1.39 \times 10^{-24}$                                                                  | $I^2 = 4\%$ , $P = 0.39$                                                                                                          | AAA | Strong |

|  |               |              |                            |                                                                   |                     |    |     |                   |                      |                              |   |    |
|--|---------------|--------------|----------------------------|-------------------------------------------------------------------|---------------------|----|-----|-------------------|----------------------|------------------------------|---|----|
|  | Deletion      | <i>GSTM1</i> | Ma X,<br>2014              | 20,552<br>cases and<br>31,419<br>controls                         | Meta, 56<br>studies | OR | 0.5 | 1.1 (1.04--1.17)  | 0.001                | $I^2 = 48\%$ , $P < 0.01$    | - | NS |
|  | Deletion      | <i>GSTT1</i> | Qin X-P<br>et al.,<br>2013 | 15,373<br>colorectal<br>cancer<br>cases and<br>21,238<br>controls | Meta, 46<br>studies | OR | NA  | 1.21 (1.10--1.33) | $9.5 \times 10^{-5}$ | $I^2 = 67.4\%$ , $P < 0.001$ | - | NS |
|  | rs41430<br>94 | 10p14        | Figueiredo<br>JC,<br>2014  | 9,287<br>cases and<br>9,117<br>controls                           | Meta, 10<br>studies | OR | NA  | NA                | 0.26                 | NA                           | - | NS |

NS: non significant, where significance is defined as  $P < 10^{-5}$ ; OR: odds ratios;  $P_i$ :  $P$  value for Cochran's Q statistic test; EAF: effect allele frequency; NA: not available; -: not applicable

\*rs17468277 and rs1045485 variants are in linkage disequilibrium and have  $r^2 = 1$  and  $D' = 1$  in European populations. Both variants are often used interchangeably in genetic association studies and meta-analyses.
